# Supplementary material
Source: Research Square preprint supplement (doi:10.21203/rs.3.rs-9288467/v1)
Supplement: Supplementary file 1 [file 44c125e2ceafa1725ed319ed.docx]

**Table S1**: Covariates considered for propensity score creation

| Variable | Data format |
| --- | --- |
| Sex | Female vs Male |
| Age at CAR-T infusion (years) | Continous |
| Number of previous lines (CAR-T included) | L2 vs L3+ |
| Time of first relapse after CAR-T | Continous |
| Ann Arbor stage at infusion1 | I-II vs III-IV |
| LDH at infusion2 | Normal vs > Upper limit |
| CAR-T cell type | Axi-cel vs Tisa-cel |
| Response after bridging | CR / PR vs SD / PD vs No bridge |
| At least one prior Autologous transplant | No / Yes |

1Ann Arbor stage at infusion was assessed before CAR-T infusion. For DESCAR-T patients, information at multidisciplinary meetings (part of standard care) where patient care is discussed and CAR-T treatment validated were used.

2LDH at infusion was assessed before CAR-T infusion. For DESCAR-T patients, when LDH at infusion was not available, LDH at lymphodepletion was used.
